# Supplementary material for: Different Metabolic Roles for Alternative Oxidase in Leaves of Palustrine and Terrestrial Species
Source: Front Plant Sci. 2021 Nov 4;12:752795. doi: 10.3389/fpls.2021.752795 (PMC8600120; doi:10.3389/fpls.2021.752795)
Supplement: Supplementary file 5 [file Table_5.xlsx]

## Sheet: Checklist
	Supplemental Table SII. Metabolite Reporting Guidelines (Checklist table)
	Level	Aspect	Information	Fill in
	general aspect	Type of metabolome analysis	targeted metabolite analysis	performed
			non-targeted metabolite class scale profiling	not performed
			non-targeted metabolome scale profiling	not performed
			non-targeted finger printing of mass features	not performed
		Type of quantification	absolute or quantification	Relative quantification
		Type of reference samples	chemically defined	-
			biologically defined	-
		Type of replication	analytical (same analytical sample preparation)	1
			technological (same biological preparation)	1
			biological (same experimental condition)	6
			full experiment	1
		Type of technology	reference publication	Lisec et al (2006)
		Sample preparation		chemical derivatized
			method of chromatography/separation	Lisec et al (2006)
			method of ionization	- 70 MeVolt hard ionization
			method of detection	electron impact ionization
	metabolite/mass feature	Metabolite	metabolite name	see table S4
			metabolite sum formula	see table S4
			metabolite structure and public source of metabolite identifier	Metabolites were identified in comparison to database entries of authentic standards (Kopka et al., 2005; Schauer et al., 2005).
		Identification	identification process	manually supervized with TagFinder software
			by authentic mass isotopomer added to one or all biological sample(s)	not performed
			by authentic reference compound within a co-processed reference mixture	not performed
			by authentic reference compound previously mapped to the analytical system	not performed
			reference library	Metabolites were identified in comparison to database entries of authentic standards (Kopka et al., 2005; Schauer et al., 2005)
			type of mass spectrum
			by match of molecular mass (single mass fragment)	A minimum of 3 unique mass fragments was required for the relative quantification of metabolite pool sizes
			by match of fragments	YES
			by match of fragmentation pattern	YES
			by match of mass spectrum to reference library	Mass spectral matching thresholds were: Match > 650 (best match = 1000) and RI-deviation < 1.0%
			type of retention index
			by match of retention time (index) to reference library	fatty acid methylesters (FAMEs)
		Quantification	type of quantification	relative quantification by internal standard and sample fresh weight
		Validity testing	Recovery testing (chemical analog)	not performed
			Recovery testing (internally added mass isotopomer)	not performed
			Recovery testing (mixture of most divergent samples from the experiment)	not performed
			Test for linear range	not performed
			Limit of quantification (LOQ)	not performed
			Limit of detection (LOD)	not performed
			Mass spectral matching thresholds were: Match > 650 (best match = 1000) and RI-deviation < 1.0%

## Sheet: Overview
Supplemental Table S5. Overview of the metabolite reporting list.
GC-TOF-MS metabolites
	A	B	C	D	E	F	G	H	I
1
2	Experiment title:		Mitochondrial electron partitioning to the alternative oxidase pathway for the metabolic re-adaptation to aquatic environments during diversification of vascular plants
3	Organism/Plant species:		Hygrophylla stricta, Acanthus mollis, Anubias heterophylla, Arum italicum, Lobelia cardinalis, Trachelium caeruleum, Leptochilus pteropus, Polypodium cambricum, Ceratopteris thalictroides, Pteris vittata
4	Organ/tissue:		Leaves
5	Analytical tool:		GC-TOF-MS
6
7	Peak/compound no.- number referenced back to the main text
8	Ret . Time- Time expected, Tag Time Index and Time deviation
9	Putative Name- putative identification of the metabolite/derivative
10	Corresponding metabolite name in literature
11	Mol. Formula- molecular formula of the metabolite or its FA adduct;
12	Mass to charge ratio (m/z)
13	(S)- identification confirmed by a standard compound
14	I, II, III- different isomers
15	Identification level (A; B; C; D)- (A) standard or NMR; (B) MS/MS; (C) MSE; (D) MS only
16
17	Peak/Compound no.	Time Expected	Tag Time Index	Time Deviation	Putative metabolite name (Derivative)	Corresponding Metabolite in Literature	Metabolite Class	Mol formula	Mass to charge ratio (m/z)	Species detected before	References	Identification level (A-D)
18	1	222650	222704	0.01	M000071_A104002-101_METB_222650_TOF_Pyruvic acid (1MEOX) (1TMS)	Pyruvate	Acid (Oxo)	C3H4O3	174	Arabidopsis, tomato, potato and others		A
19	2	271580	272074	0.21	M000030_A122001-101_METB_271580_TOF_Valine, DL- (2TMS)	Valine	Acid (Amino)	C5H11NO2	144	Arabidopsis, tomato, potato and others		A
20	3	291783	292327	0.18	M000053_A129003-101_METB_291783_TOF_Glycerol (3TMS)	Glycerol	polyol (Triol)	C3H8O3	205	Arabidopsis, tomato, potato and others		A
21	4	319193	319265	0.03	M000017_A132002-101_METB_319193_TOF_Isoleucine, L- (2TMS)	Isoleucine	Acid (Amino)	C6H13NO2	158	Arabidopsis, tomato, potato and others		A
22	5	325180	325193	0.02	M000031_A133001-101_METB_325180_TOF_Glycine (3TMS)	Glycine	Acid (Amino)	C2H5NO2	174	Arabidopsis, tomato, potato and others		A
23	6	333520	333356	-0.03	M000075_A129001-101_METB_333520_TOF_Phosphoric acid (3TMS)	Phosphoric acid	Acid (Phosphoric)	H3PO4	299	Arabidopsis, tomato, potato and others		A
24	7	338693	338658	0	M000029_A132003-101_METB_338693_TOF_Proline, L- (2TMS)	Proline	Acid (Amino)	C5H9NO2	142	Arabidopsis, tomato, potato and others		A
25	8	345050	345070	0.01	M000073_A135003-101_METB_345050_TOF_Glyceric acid, DL- (3TMS)	Glycerate	Acid (Hydroxy)	C3H6O4	189	Arabidopsis, tomato, potato and others		A
26	9	354060	209049	0.2	M000026_A138002-101_METB_354060_TOF_Alanine, DL- (3TMS)	Alanine	Acid (Amino)	C3H7NO2	188	Arabidopsis, tomato, potato and others		A
27	10	357523	357708	0.06	M000015_A138001-101_METB_357523_TOF_Serine, DL- (3TMS)	Serine	Acid (Amino)	C3H7NO3	204	Arabidopsis, tomato, potato and others		A
28	11	365427	365469	0	M000074_A134001-101_METB_365427_TOF_Succinic acid (2TMS)	Succinate	Acid (Dicarboxylic)	C4H6O4	247	Arabidopsis, tomato, potato and others		A
29	12	368365	367697	-0.19	M000016_A140001-101_METB_368365_TOF_Threonine, DL- (3TMS)	Threonine	Acid (Amino)	C4H9NO3	117	Arabidopsis, tomato, potato and others		A
30	13	371255	371138	-0.02	M000067_A137001-101_METB_371255_TOF_Fumaric acid (2TMS)	Fumarate	Acid (Dicarboxylic)	C4H4O4	245	Arabidopsis, tomato, potato and others		A
31	14	386210	386012	-0.06	M000457_A133004-101_METB_386210_TOF_Nicotinic acid (1TMS)	Nicotinic acid	Acid (Oxo)	C6H5NO2	180	Arabidopsis, tomato, potato and others		A
32	15	408455	409097	0.15	M000054_A150002-101_METB_408455_TOF_Erythritol (4TMS)	Erythritol	Polyol (Tetraol)	C4H10O4	205	Arabidopsis, tomato, potato and others		A
33	16	440995	441448	0.18	M000065_A149001-101_METB_440995_TOF_Malic acid, DL- (3TMS)	Malate	Acid (Hydroxy)	C4H6O5	233	Arabidopsis, tomato, potato and others		A
34	17	452200	452465	0.05	M000114_A153003-101_METB_452200_TOF_Butyric acid, 4-amino- (3TMS)	GABA	Acid (Amino)	C4H9NO2	86	Tomato, Arabidopsis, potato, Lotus japonicus		A
35	18	458330	458576	-0.01	M000078_A156001-101_METB_458330_TOF_Threonic acid (4TMS)	Threonate	Acid (Hydroxy)	C4H8O5	292	Arabidopsis, tomato, potato and others		A
36	19	498150	498741	0.14	M000579_A166001-101_METB_498150_TOF_Xylose, D- (1MEOX) (4TMS)	Xylose	Sugar (aldopentose)	C5H10O5	103	Arabidopsis, tomato, potato and others		A
37	20	507780	508033	0.06	M000036_A163001-101_METB_507780_TOF_Glutamic acid, DL- (3TMS)	Glutamic acid	Acid (Amino)	C5H9NO4	128	Tomato, Arabidopsis, potato, Lotus japonicus		A
38	21	515530	515848	0.06	M000590_A172002-101_METB_515530_TOF_Rhamnose, DL- (1MEOX) (4TMS)	Rhamnose	Sugar (deoxy)	C6H12O5	117	Arabidopsis, tomato, potato and others		A
39	22	523847	523897	0.02	M000571_A158004-101_METB_523847_TOF_Glutaric acid, 2-oxo- (1MEOX) (2TMS)	Glutaric acid, 2-oxo	Acid (Oxo)	C5H6O5	89	Tomato, Arabidopsis		A
40	23	531145	531142	-0.04	M000011_A164001-101_METB_531145_TOF_Phenylalanine, DL- (2TMS)	Phenylalanine	Acid (Amino)	C9H11NO2	218	Arabidopsis, tomato, potato and others		A
41	24	550100	550154	0.03	M000013_A168001-101_METB_550100_TOF_Asparagine, DL- (3TMS)	Asparagine	Acid (Amino)	C4H8N2O3	116	Arabidopsis, tomato, potato and others		A
42	25	557320	556681	-0.1	M000248_A172001-101_METB_557320_TOF_Glucose, 1,6-anhydro, beta-D- (3TMS)	beta-1,6-anhydro-Glucose	Sugar (anhydride)	C6H10O5	204	Arabidopsis, tomato, potato and others		A
43	26	577930	578365	0.08	M000007_A185001-101_METB_577930_TOF_Quinic acid, D(-)- (5TMS)	Quinic acid	Acid (Chlorogenic)	C7H12O6	345	Arabidopsis, tomato, potato and others		A
44	27	579380	579980	0.19	M000606_A187002-101_METB_579380_TOF_Fructose, D- (1MEOX) (5TMS)	Fructose	Sugar (Hexose, ketose)	C6H12O6	217	Arabidopsis, tomato, potato and others		A
45	28	592883	592949	0.01	M000069_A182004-101_METB-METB_592883_TOF_Citric acid (4TMS)	Citrate	Acid (Tricarboxylic)	C6H8O7	273	Arabidopsis, tomato, potato and others		A
46	29	590400	590786	0.1	M000040_A189002-101_METB_590400_TOF_Glucose, D- (1MEOX) (5TMS)	Glucose	Sugar (Hexose, aldose)	C6H12O6	160	Arabidopsis, tomato, potato and others		A
47	30	624990	625121	0.07	M000082_A185002-101_METB-METB_624990_TOF_Dehydroascorbic acid dimer (TMS)	Dehydroascorbate	Acid (Hydroxy)	C6H6O6	316	Arabidopsis, tomato, potato and others		A
48	31	653910	654396	0.16	M000060_A209002-101_METB_653910_TOF_Inositol, myo- (6TMS)	myo-Inositol	Polyol (Inositol)	C6H12O6	305	Arabidopsis, tomato, potato and others		A
49	32	744935	744864	-0.01	M000649_A214001-101_METB_744935_TOF_Caffeic acid, trans- (3TMS)	Caffeic acid	Acid (Hydroxy)	C9H8O4	219	Arabidopsis, tomato, potato and others		A
	33	790560	790521	0.02	M000012_A223001-101_METB_790560_TOF_Tryptophan, L- (3TMS)	Tryptophan	Acid (Amino)	C11H12N2O2	202	Arabidopsis, tomato, potato and others		A
50	34	840783	841371	0.08	M000044_A264001-101_METB_840783_TOF_Sucrose, D- (8TMS)	Sucrose	Sugar (disaccharide)	C12H22O11	361	Arabidopsis, tomato, potato and others		A
51	35	870355	870654	0.03	M000048_A274001-101_METB_870355_TOF_Maltose, D- (1MEOX) (8TMS)	Maltose	Sugar (Disaccharide)	C12H22O11	204	Arabidopsis, tomato, potato and others		A
52	36	876240	876285	0.01	M000671_A274002-101_METB_876240_TOF_Trehalose, alpha,alpha'-, D- (8TMS)	Trehalose	Sugar (Disaccharide)	C12H22O11	361	Arabidopsis, tomato, potato and others		A
53	37	914380	913970	-0.04	M000171_A287003-101_METB_914380_TOF_Melibiose (1MEOX) (8TMS)	Melibiose	Sugar (disaccharide)	C12H22O11	204	Arabidopsis, tomato, potato and others		A
54	38	940280	939971	0	M000673_A299002-101_METB_940280_EIROE_Galactinol (9TMS)	Galactinol	Conjugate (Hexosyl, Inositol)	C12H22O11	191	Arabidopsis, tomato, potato and others		A
55	39	1025600	1025626	0.05	M000003_A311001-101_METB_1025600_TOF_Quinic acid, 3-caffeoyl-, trans- (6TMS)	Quinic acid caffeoyl	Acid (Chlorogenic)	C16H18O9	255	Arabidopsis, tomato, potato and others		A
56	40	1033367	1033840	0.03	M000049_A337002-101_METB_1033367_TOF_Raffinose (11TMS)	Raffinose	Sugar (Trisaccharide)	C18H32O16	361	Arabidopsis, tomato, potato and others		A
57	41	501603	501865	0.05	M000155_A173001-101_IS (QUAN)_501603_TOF_Ribitol, D- (5TMS)	Ribitol	Polyol (Pentitol)	C5H12O5	205	Internal standard		A
